# Supplementary material
Source: PubMed Central journal article supplement (PMC9262585)

## SUPPLEMENTARY FIGURE LEGENDS

### **Supplementary Figure S1. Further characterization of *OIP5-AS1* levels, miR-7 levels, and myoblast morphology.**

(A) Number of *OIP5-AS1* and miR-7 copies per myoblast (AB678) and per nucleus-equivalent in AB678 myotubes, as calculated by standard curve analysis, proportional Ct value relative to an RNA of known abundance, and (only for *OIP5-AS1*) ddPCR analysis (Materials and Methods). (B) Human AB678 myoblasts were transfected with Ctrl siRNA or with ZSWIM8 siRNA #1 or siRNA #2; 24 h later, the efficiency of ZSWIM8 mRNA silencing was determined by RT-qPCR analysis. Data were normalized to *GAPDH* mRNA levels in the same RNA samples. (C) AB678 myoblasts were transfected with Ctrl siRNA or *OIP5-AS1*-directed siRNA #2; 24 h later, myoblasts were placed in differentiation medium for indicated times. The efficiency of silencing *OIP5-AS1* was determined by RT-qPCR analysis (*graph*), and the impact on differentiation (Diff) was monitored by assessing MYH levels by immunofluorescence (*micrographs*). (D) Human AB678 myoblasts were transfected with Ctrl miR or with miR-7 mimic at the indicated concentration; 24 h later, myoblasts were placed in differentiation medium, and differentiation was monitored 72 h later by myotube formation using phase-contrast microscopy. (E) Human AB678 myoblasts were transfected with Ctrl miR, miR-7 mimic, or miR-7 inhibitor; 24 h later, myoblasts were placed in differentiation media, and differentiation was monitored 72 h later by assessing myotube formation using phase-contrast microscopy. Data in (B,C) represent the means  $\pm$  SEM from three or more independent experiments. Significance was established using Student's *t*-test. \*\*,  $p < 0.01$ ; \*\*\*,  $p < 0.001$ . Other data are representative of three or more biological replicates.

### **Supplementary Figure S2. Expression levels and impact of MYMX on myogenesis.**

(A) Volcano plot representation of RNAs differentially abundant when comparing proliferating and differentiated myoblasts. *MYMX* mRNA is highlighted as one of the most robustly increased transcripts in the differentiated population. (B) Number of *MYMX* mRNA copies per myoblast (AB678) and per nucleus-equivalent in AB678 myotubes, as calculated by standard curve analysis and proportional Ct value relative to an RNA of known abundance (Materials and Methods). (C, D) AB678 myoblasts were transfected with Ctrl siRNA or one of two different MYMX-directed siRNAs; 24 h later, they were placed in differentiation medium for 72 h, and the presence of myotubes was monitored to evaluate the extent of differentiation after transfecting MYMX siRNA #1 (C) or MYMX siRNA #2 (D). (E) AB678 myoblasts were transfected with Ctrl siRNA or MYMX-directed siRNA #2; 24 h later, myoblasts were placed in differentiation medium for the indicated times (Diff), and the silencing efficiency and presence

of myotubes was monitored by Western blots. Representative images from three or more biological replicates are shown.

**Supplementary Figure S3. Effect of miR-7 overexpression on polysome profiles and reporter**

**construct analysis.** (A) Twenty-four hours after transfecting plasmids psiCHECK2-MYMX(3'WT) or psiCHECK2-MYMX(3'mut), AB678 myoblasts were further incubated with fresh proliferation medium for 24 h, and luciferase activity (RL/FL) was calculated. (B) Twenty-four hours after co-transfecting psiCHECK2 or test reporter psiCHECK2-MYMX(3'WT) with either Ctrl siRNA or OIP5-AS1 siRNA, AB678 myoblasts were further incubated with fresh proliferation medium for 24 h, whereupon luciferase (RL/FL) activity was calculated. (C) Twenty-four hours after transfecting Ctrl miR or miR-7 mimic, AB678 myoblasts were placed in differentiation medium for an additional 24 h, and then harvested. Cytoplasmic extracts were fractionated by centrifugation through sucrose density gradients. Global polysome profiles depicting ribosomal subunits (40S, 60S), monosomes (80S), as well as low- and high-molecular weight polysomes (LMWP, HMWP) were prepared. Representative polysomes from three or more biological replicates are shown. (D-F) Twelve hours after co-transfecting the parent reporter (psiCHECK2) or test reporter psiCHECK2-MYMX(3'WT) along with either Ctrl miR or miR-7, into AB678 myoblasts and inducing differentiation, *RL* mRNA and *FL* mRNA levels were quantified by RT-qPCR analysis, and *RL* mRNA/*FL* mRNA ratios were calculated (D). Twenty-four hours after co-transfecting the plasmids psiCHECK2-MYMX(3'WT) and psiCHECK2-MYMX(3'mut), AB678 myoblasts were induced to differentiate for 24 h; *RL* mRNA and *FL* mRNA levels were then quantified by RT-qPCR analysis, and the relative ratios of *RL* mRNA to *FL* mRNA were calculated (E). Twenty-four hours after co-transfecting psiCHECK2 or test reporter psiCHECK2-MYMX(3'WT) and control siRNA or *OIP5-AS1*-directed siRNA, AB678 myoblasts were induced to differentiate for 24 h, *RL* mRNA and *FL* mRNA levels were quantified by RT-qPCR analysis, and the ratios of *RL* mRNA to *FL* mRNA were calculated (F). Data in (A,B,D-F) represent the means  $\pm$  SEM from three or more independent experiments. Significance was established using Student's *t*-test. \*,  $p < 0.05$ .

**Supplementary Figure S4. Further analysis of myoblast fusion using fluorescent reporter cells.** (A)

Individual fluorescence fields from the merged images in main Figure 6B and 6C are shown. EGFP-labeled AB678 cells were transfected with Ctrl miR or miR-7 mimic and further mixed with mCherry-labeled AB678. Representative micrographs of individual fluorescence (*left, center*) and merged fluorescence (*right*) are shown; homologous fusion (EGFP+ only or mCherry+ only) as well as heterologous syncytia (both EGFP+ and mCherry+) can be observed. (B) Individual fluorescence fields

from the merged images in main Figure 6B and 6C are shown. EGFP-labeled AB678 cells were transfected with Ctrl siRNA or OIP5-AS1-directed siRNA and further mixed with mCherry-labeled AB678 cells. Representative micrographs of individual fluorescence (*left, center*) and merged fluorescence (*right*) are shown; homologous fusion (EGFP<sup>+</sup> only or mCherry<sup>+</sup> only) and heterologous syncytia (both EGFP<sup>+</sup> only and mCherry<sup>+</sup> only) can be observed. Representative images from three or more biological replicates are shown.

**Supplementary Figure S5. Additional characterization of OIP5-AS1:miR-7 TSB.** (A) AB678 myoblasts were transfected with Ctrl TSB or OIP5-AS1:miR-7 TSB; 24 h later, they were placed in differentiation medium, and differentiation was determined 72 h later by monitoring myotube formation using phase-contrast microscopy. (B) As described in the main Figure 7H, EGFP-labeled AB678 cells were transfected with Ctrl TSB (*top*) or OIP5-AS1:miR-7 TSB (*bottom*) and further mixed with mCherry-labeled AB678. The individual fluorescence signals (*left, center*) and merged fluorescence signals (*right*) are shown. Fusion ability was assessed by monitoring homologous fusion (EGFP<sup>+</sup> only or mCherry<sup>+</sup> only) as well as heterologous syncytia (both EGFP<sup>+</sup> and mCherry<sup>+</sup>). Representative images from three or more biological replicates are shown.

**Supplementary Figure S6. Additional characterization of miR-7 on myogenic gene expression, as assessed by the presence of OIP5-AS1:miR-7 TSB.** Expression levels of 37 mRNAs that adhered to three criteria: (1) predicted to be miR-7 targets as determined by using the miRDB database, (2) significantly downregulated in myoblasts transfected with OIP5-AS1:miR-7 TSB (at either 0, 24 or 48 h of differentiation), and upregulated during myogenesis (at 24 h). Significance was established using  $\text{padj} < 0.05$ , and  $\log_2\text{FC} > 1$ .

**Supplementary Figure S7. Additional characterization of OIP5-AS1:MEF2C TSB.** (A) AB678 myoblasts were transfected with Ctrl TSB or OIP5-AS1:MEF2C TSB; 24 h later, they were placed in differentiation medium for 24 h. Cell lysates were then collected, incubated with OIP5-AS1-directed biotinylated ASOs, and RNA complexes pulled down using streptavidin beads (Materials and Methods). The presence of OIP5-AS1 and MEF2C mRNAs in the pulldown material was assessed by RT-qPCR analysis and normalized to the levels of GAPDH mRNA. (B) AB678 myoblasts were transfected with Ctrl TSB or OIP5-AS1:MEF2C TSB; 24 h later, they were placed in differentiation medium for 24 h, and the levels of MEF2C mRNAs were assessed by RT-qPCR analysis. (C) AB1167 myoblasts were transfected with Ctrl TSB (50 nM), OIP5-AS1:miR-7 TSB (50 nM), OIP5-AS1:MEF2C TSB (50 nM)

or a cocktail of OIP5-AS1:miR-7 TSB (25 nM) plus OIP5-AS1:MEF2C TSB (25 nM); 24 h later, they were placed in differentiation medium for 72 h, and differentiation was monitored by assessing MYH signals by immunofluorescence. Data in (A,B) represent the means  $\pm$  SEM from three or more independent experiments. Significance was established using Student's *t*-test. \*,  $p < 0.05$ ; \*\*,  $p < 0.01$ ; \*\*\*,  $p < 0.001$ . Other data are representative of three or more biological replicates.

**Supplementary Table S1. Oligomers used in this study.**

| Oligomer name                     | Oligomer sequence                                      |
|-----------------------------------|--------------------------------------------------------|
| MEF2C-F                           | GCAACAGCAACACCTACATAAC                                 |
| MEF2C-R                           | GTACGGTCTCTAGGAGGAGAAA                                 |
| MYOG-F                            | GCCCTGAATTGAGAGAGAAGAA                                 |
| MYOG-R                            | TGGCAGCTTTACAAACAACAC                                  |
| OIP5-AS1-F                        | TTGAGAAGCTGCGAAGATGG                                   |
| OIP5-AS1-R                        | GGGAGGAAGAATGTTCCGGTTAG                                |
| MYH7-F                            | AAAGCTGCTGGAACGTAGAG                                   |
| MYH7-R                            | GCCATCTCCTTCTCTCTTTCTG                                 |
| 18S rRNA-F                        | CGAACGTCTGCCCTATCAACTT                                 |
| 18S rRNA-R                        | ACCCGTGGTCACCATGGTA                                    |
| ACTB-F                            | CATGTACGTTGCTATCCAGGC                                  |
| ACTB-R                            | CTCCTTAATGTCACGCACGAT                                  |
| GAPDH-F                           | GGACGCAGATCCCTCCAAAAT                                  |
| GAPDH-R                           | GGCTGTTGTCATACTTCTCATGG                                |
| MYMX-F                            | CTCCCAAAGACCACTCCTAATC                                 |
| MYMX-R                            | TGTCACTTGCCCTCAGTTAAG                                  |
| ZSWIM8-F                          | CCCAGTCAACAGCCATCAATA                                  |
| ZSWIM8-R                          | GAGTGTGCGATTTCATCCAGATACC                              |
| Renilla Luciferase-F              | TCGTCCATGCTGAGAGTGTC                                   |
| Renilla Luciferase-R              | CTAACCTCGCCCTTCTCCTT                                   |
| Firefly Luciferase-F              | TGCAGAAGATCCTGAACGTG                                   |
| Firefly Luciferase-R              | CGGTAGACCCAGAGCTGTTT                                   |
| Pre-miR-7 primer                  | GATGTTGGCCTAGTTCTGTG                                   |
| miR-7-5p primer                   | TGGAAGACTAGTGATTTTGTGTT                                |
| miR-7-3p primer                   | CAACAAATCACAGTCTGCCATA                                 |
|                                   |                                                        |
| OIP5-AS1 siRNA #1 sense           | rGrGrCrUrGrArGrUrUrCrArUrUrGrArArArCrArGrGTG           |
| OIP5-AS1 siRNA #1 antisense       | rCrArCrCrUrGrUrUrCrArArArUrGrArArArCrUrCrArGrCrCrUrU   |
| OIP5-AS1 siRNA #2 sense           | rGrArArArUrGrUrGrGrCrUrArUrCrArCrUrCrUrCrUrACA         |
| OIP5-AS1 siRNA #2 antisense       | rUrGrUrArGrArGrArArGrUrGrArUrArGrCrCrArCrArUrUrCrArA   |
| MYMX siRNA#1 sense                | rGrGrArCrCrUrArCrCrUrUrArArArUrArArUrArUrCrUGA         |
| MYMX siRNA#1 antisense            | rUrCrArGrArUrArUrUrUrArArGrUrArGrUrCrCrUrG             |
| MYMX siRNA#2 sense                | rArArCrArGrArArArUrGrUrCrUrUrCrUrGrGrArGrAAT           |
| MYMX siRNA#2 antisense            | rArUrUrCrUrUrCrCrArGrArArArGrArCrArUrUrCrUrGrUrUrGrG   |
| ZSWIM8 siRNA#1 sense              | rCrUrUrGrGrUrArUrCrUrGrGrArUrGrArArUrCrGrArCrACT       |
| ZSWIM8 siRNA#1 antisense          | rArGrUrGrUrCrGrArUrUrCrArUrCrCrArGrArUrArCrCrArArGrUrA |
| ZSWIM8 siRNA#2 sense              | rCrCrUrUrUrUrUrArCrUrCrUrArGrUrCrGrArArArAAA           |
| ZSWIM8 siRNA#2 antisense          | rUrUrUrUrUrUrCrGrArCrUrArGrArGrUrArArArArArGrGrArG     |
| hsa-miR-7-5p (for standard curve) | UGGAAGACUAGUGAUUUUGUUGUU                               |
|                                   |                                                        |

**Supplementary Table S2. Antisense Oligomers (ASOs) used in this study.**

| ASO name         | 3'-Biotin ASO sequence |
|------------------|------------------------|
| OIP5-AS1_1       | GGGAGGAAGAATGTTCCGGTT  |
| OIP5-AS1_2       | ATTTTCTTCCTGTGATAAGG   |
| OIP5-AS1_3       | AAAGAAGCAGGACTACCCAC   |
| OIP5-AS1_4       | AGCAGGATAACTGGAATCCT   |
| OIP5-AS1_5       | TTCACAAATACCACCACCTA   |
| OIP5-AS1_6       | CTGTGCTTATCATGGTAGTG   |
| OIP5-AS1_7       | GGAAAATTCTCTCATCCTCC   |
| OIP5-AS1_8       | TTGGGTTGCAGGAAGAGTTA   |
| OIP5-AS1_9       | AGCCTTTTTCAGCCTAGAAAT  |
| OIP5-AS1_10      | GGTTTCTTTTCCACGATGAC   |
| OIP5-AS1_11      | AATACATACAATGGTCCTCT   |
| OIP5-AS1_12      | ATGGTGCCAAAAGTACAGGT   |
| OIP5-AS1_13      | TGGTTTCCAGATACCTTATG   |
| OIP5-AS1_14      | CAAGGCAGCTTTTATAGAGGTA |
| OIP5-AS1_15      | GCAGGGTCTTTAACCTTTAA   |
| OIP5-AS1_16      | AGCAGCTAGTTTTATTTCAGC  |
| OIP5-AS1_17      | ACTGCTGACATCATTGTACT   |
| OIP5-AS1_18      | TCAAGCTATCAATACCCTGA   |
| OIP5-AS1_19      | AGAAGCTCCACATCTATCAC   |
| OIP5-AS1_20      | GTCCTGACAGTTTGAATGTC   |
| OIP5-AS1_21      | GCAGGGGTACTTTATAGTTG   |
| OIP5-AS1_22      | CGTCATTTGTCACAATCACT   |
| OIP5-AS1_23      | GTTCTTAATCTTTACTGGCT   |
| OIP5-AS1_24      | CAGAGCTTCCAACTTTTTTA   |
| (control) LacZ_1 | CAGTTGGTCTGGTGTCAAAA   |
| (control) LacZ_2 | TGGCTGAATATCGACGGTTT   |
| (control) LacZ_3 | GGGACGCGCGAATTGAATTA   |
| (control) LacZ_4 | GGATTAGGGCCGCAAGAAAA   |
| (control) LacZ_5 | GATGGTAGTGGTCAAATGGC   |
| (control) LacZ_6 | AGTGCTCGGCAGATACACTT   |
| (control) LacZ_7 | CTGGATAACGACATTGGCGT   |

**A**

| Stage          | Copies of <i>OIP5-AS1</i>                  | Stage          | Copies of miR-7                           |
|----------------|--------------------------------------------|----------------|-------------------------------------------|
| Proliferating  | ~25-41 per myoblast                        | Proliferating  | ~70-84 per myoblast                       |
| Differentiated | ~79-126 per nucleus-equivalent in myotubes | Differentiated | ~14-17 per nucleus-equivalent in myotubes |

**B**

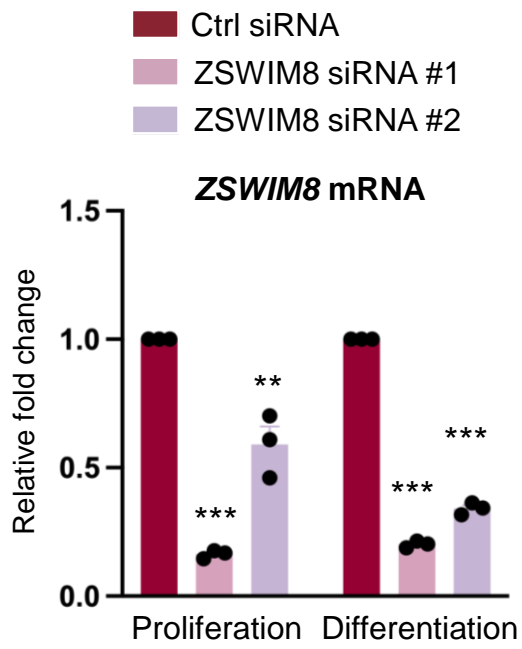

**C**

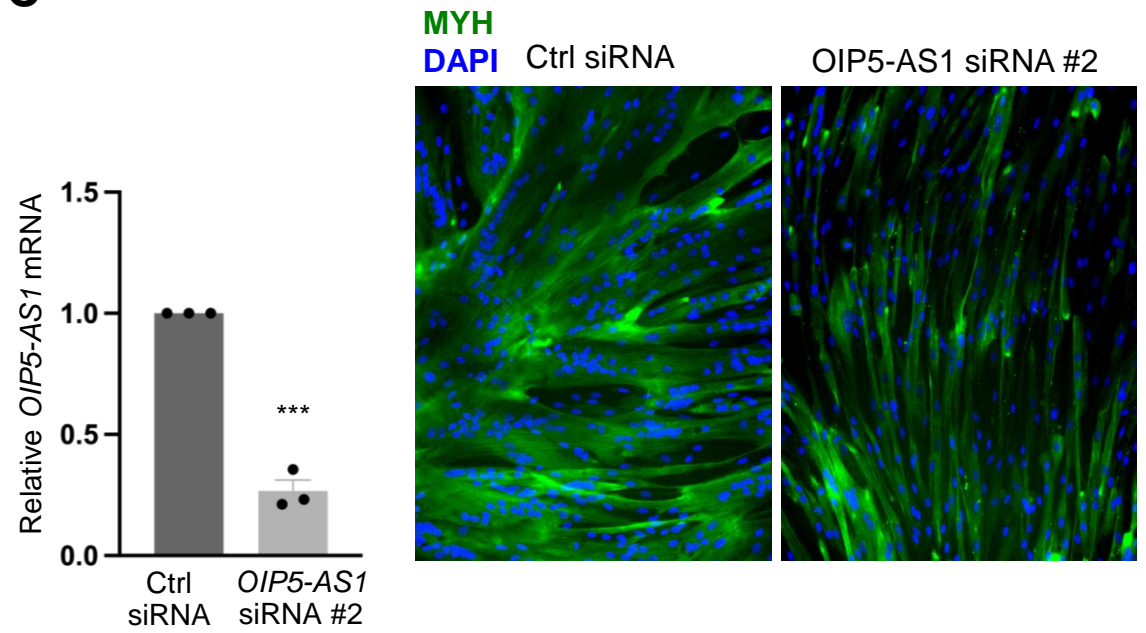

**D**

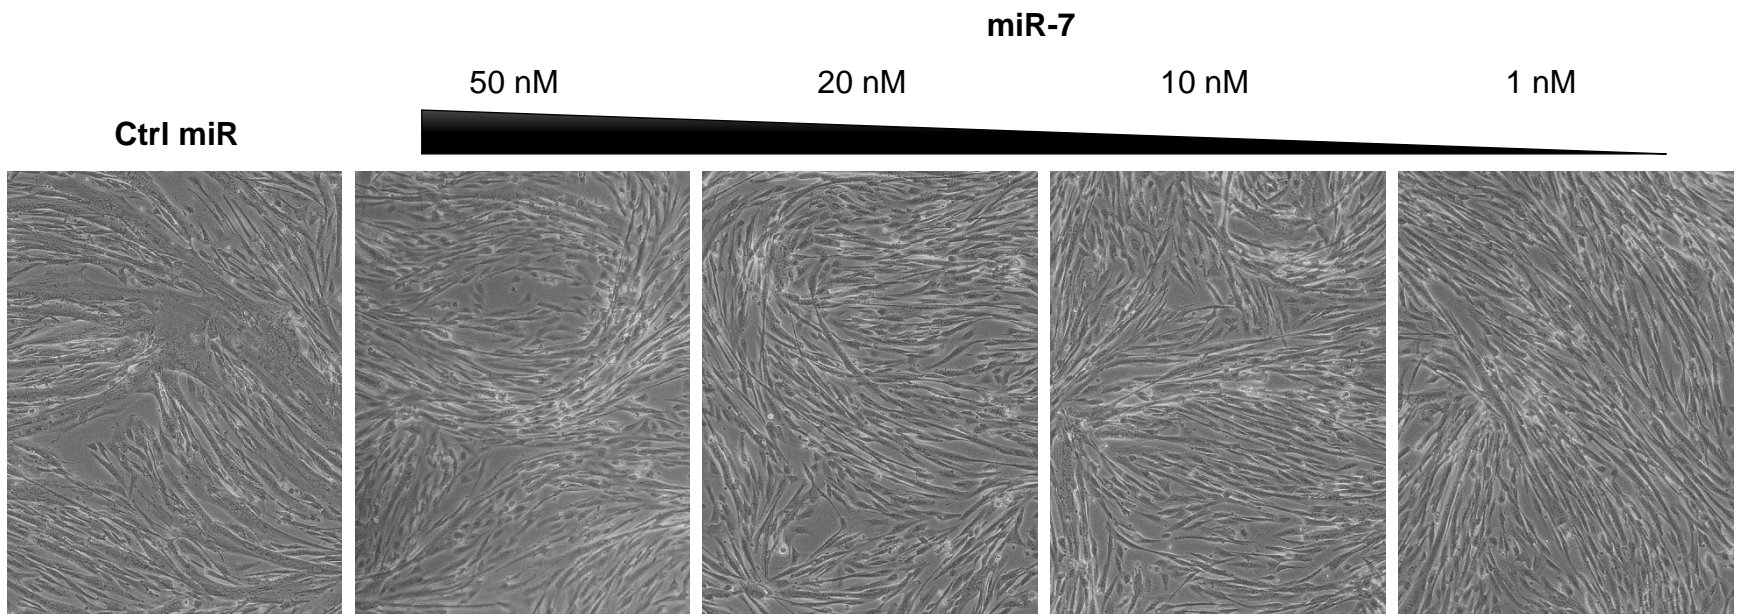

**E**

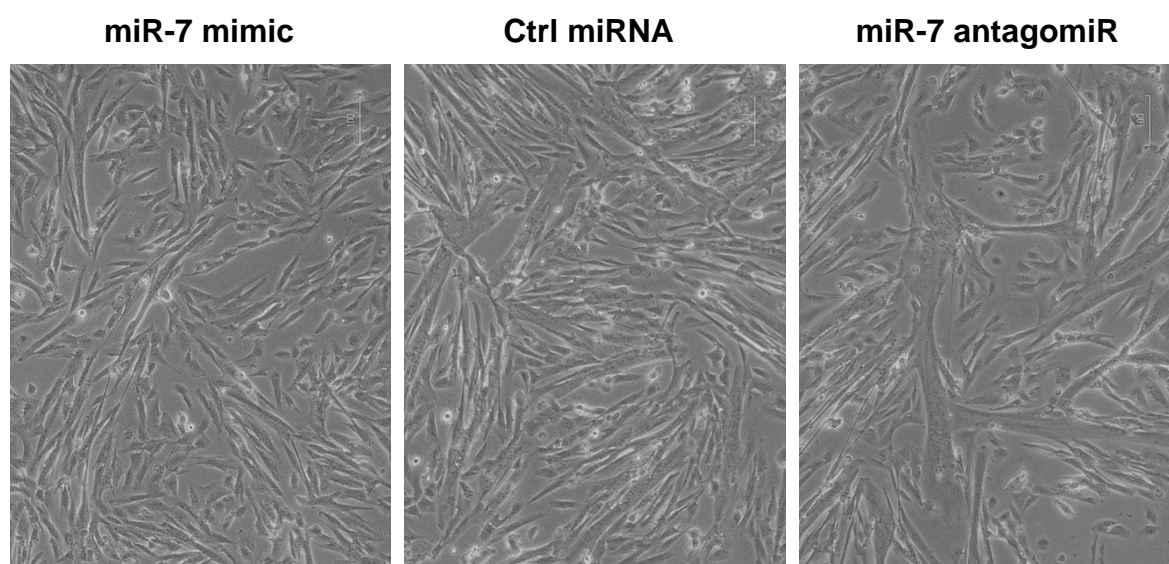

**A** Differentiating (24 h) vs. Proliferating (0 h)

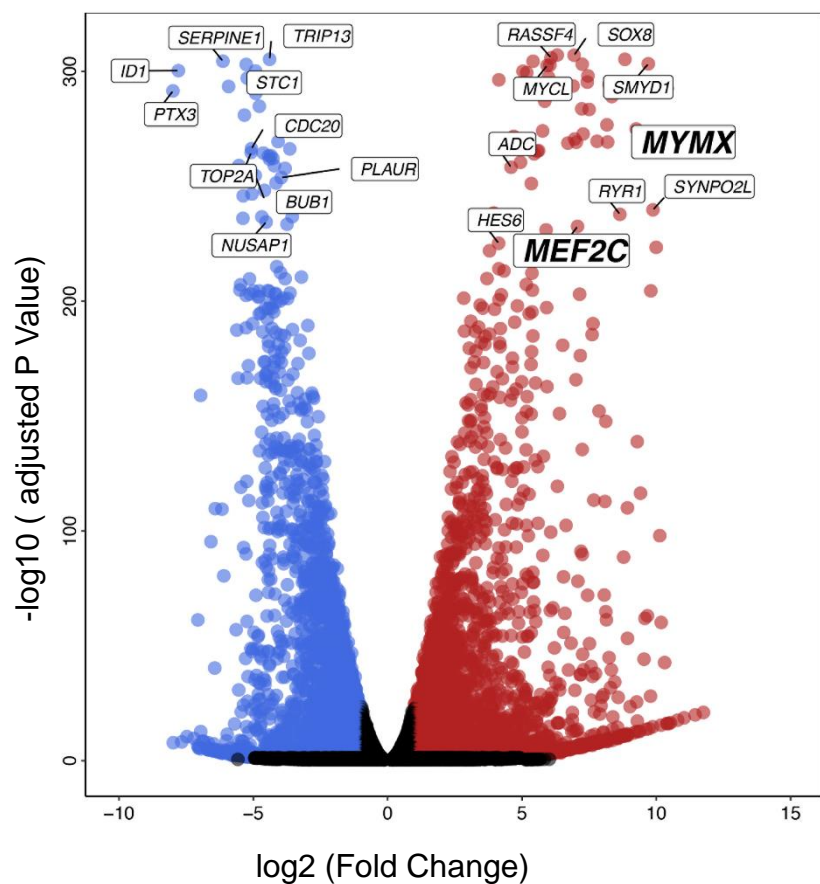

**B**

| Stage          | Copies of <i>MYMX</i> mRNA                     |
|----------------|------------------------------------------------|
| Proliferating  | ~8 per myoblast                                |
| Differentiated | ~137-111 per nucleus-equivalent at peak levels |

**C** Ctrl siRNA MYMX siRNA #1

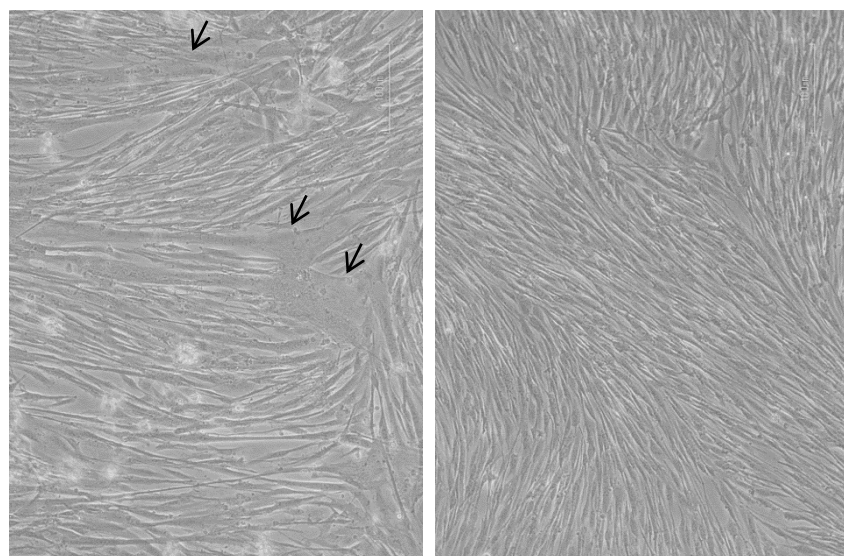

**D** Ctrl siRNA MYMX siRNA #2

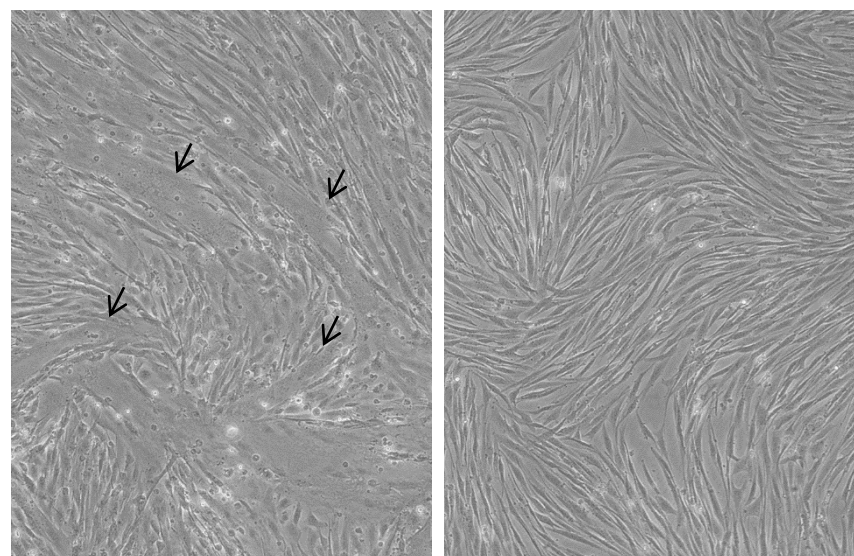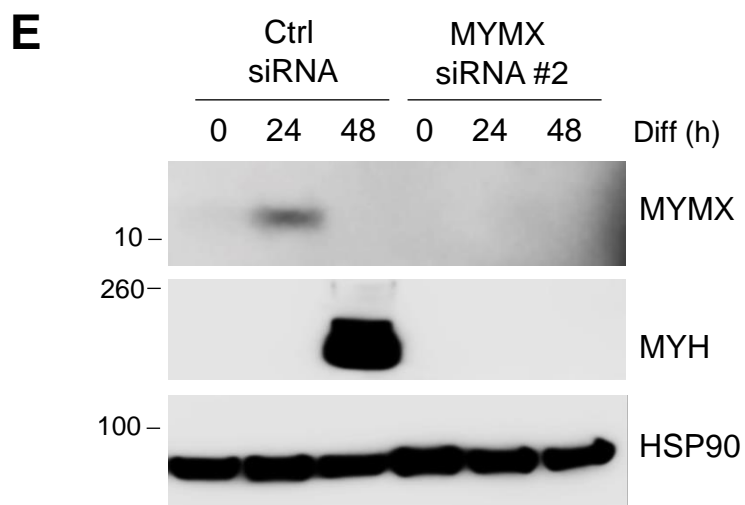



**A**

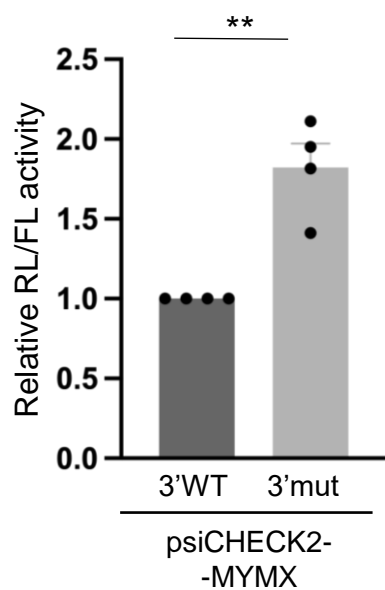

**B**

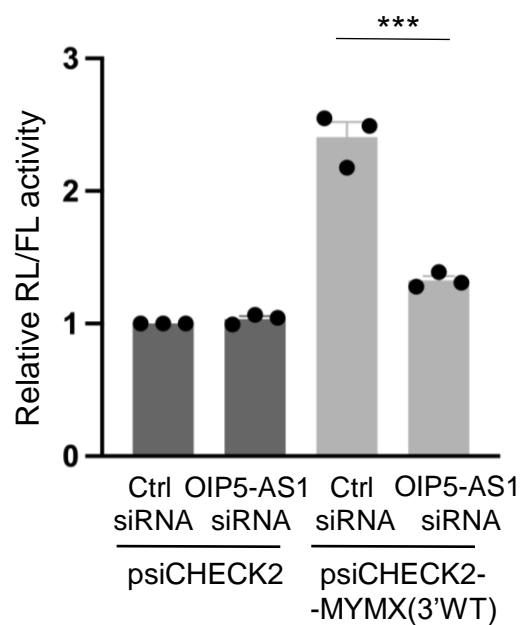

**C**

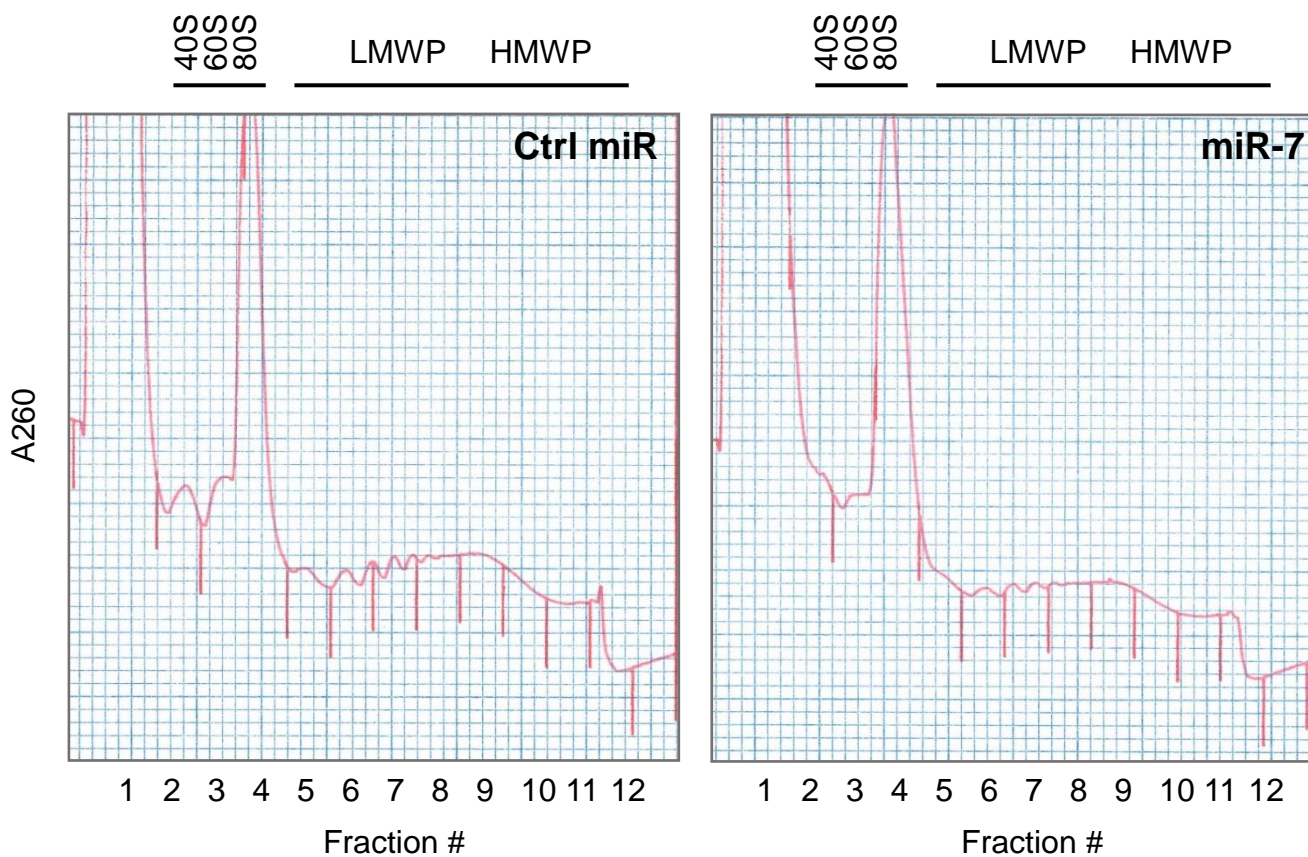

**D**

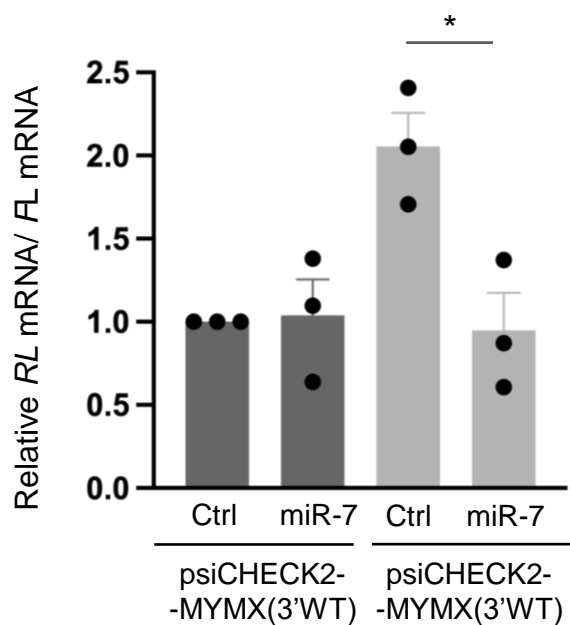

**E**

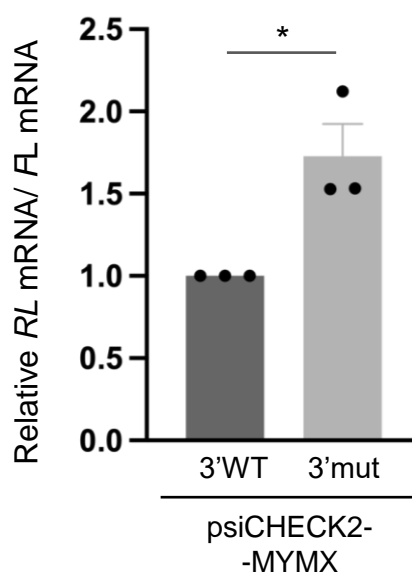

**F**

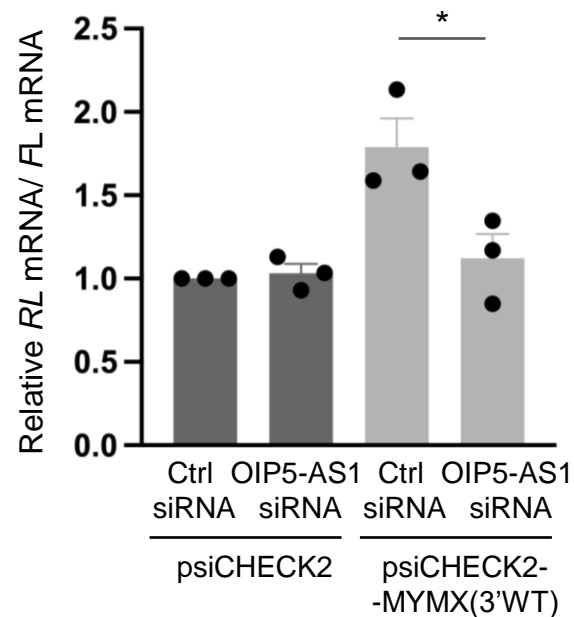

**A**  
 EGFP  
 mCherry  
 DAPI

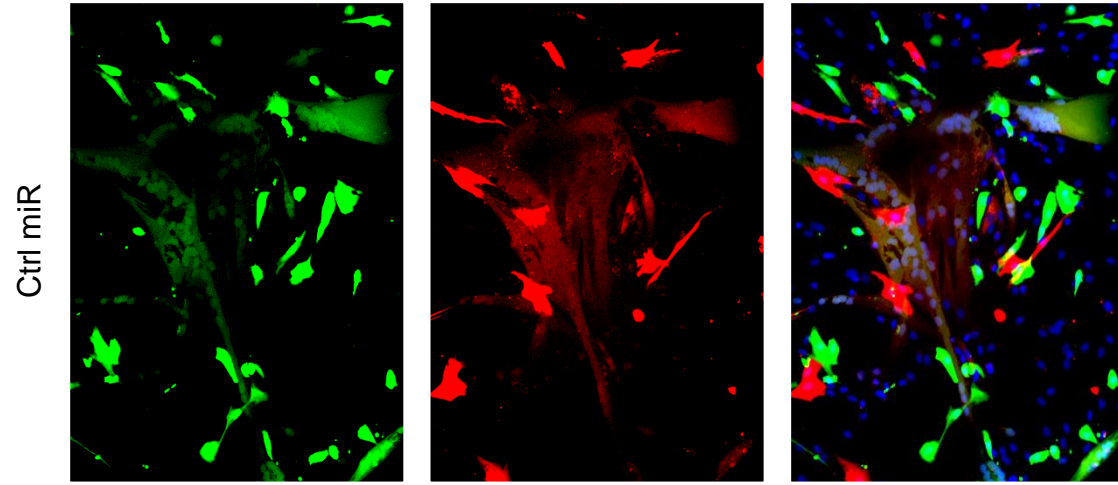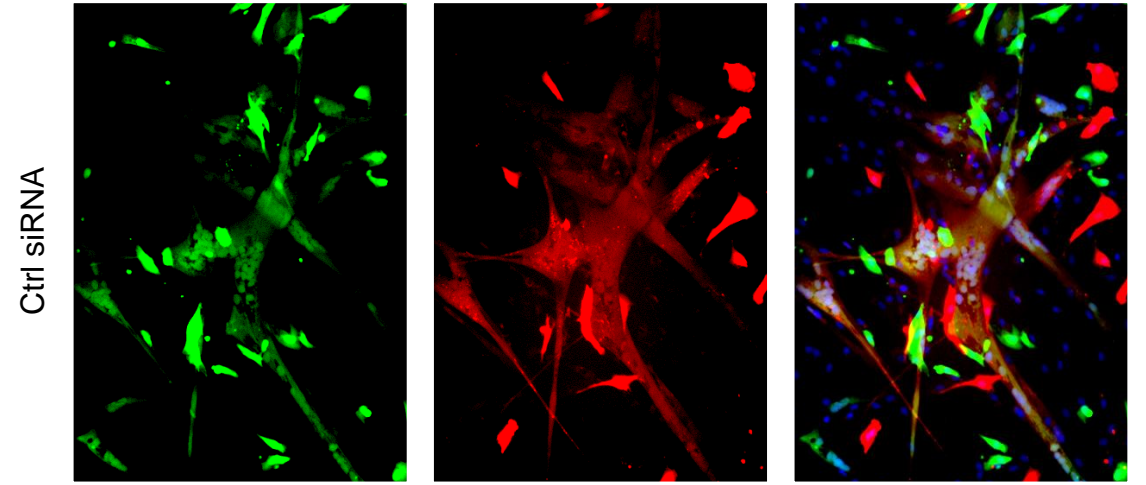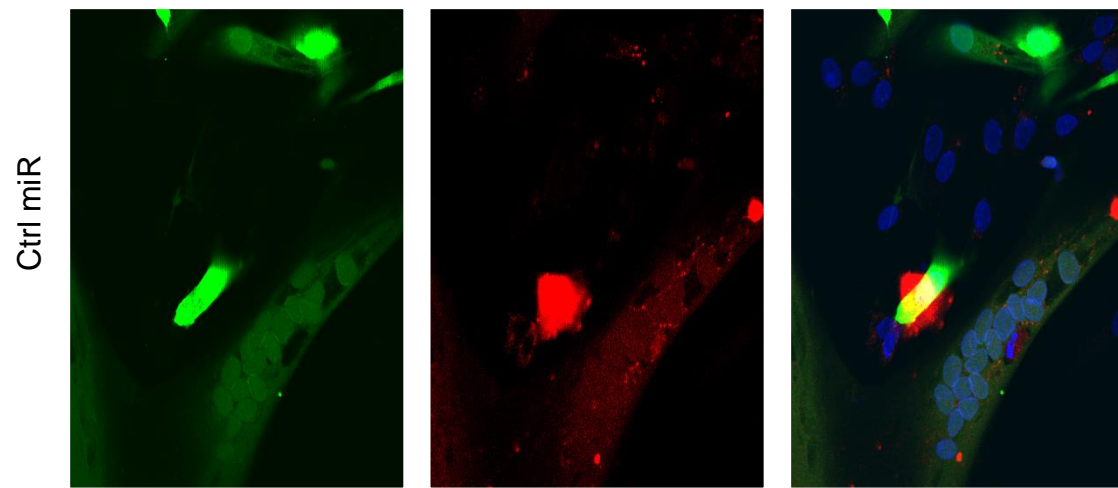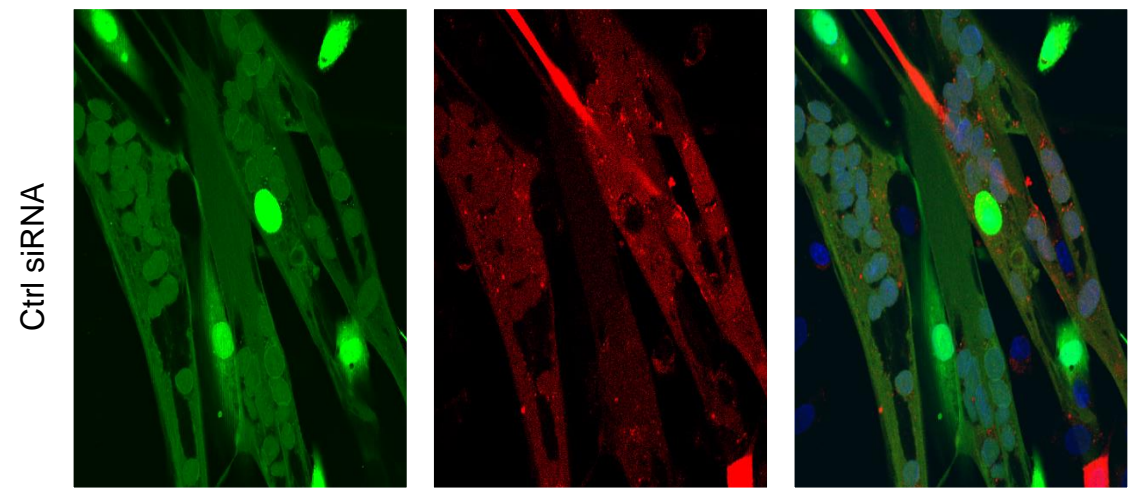

**B**

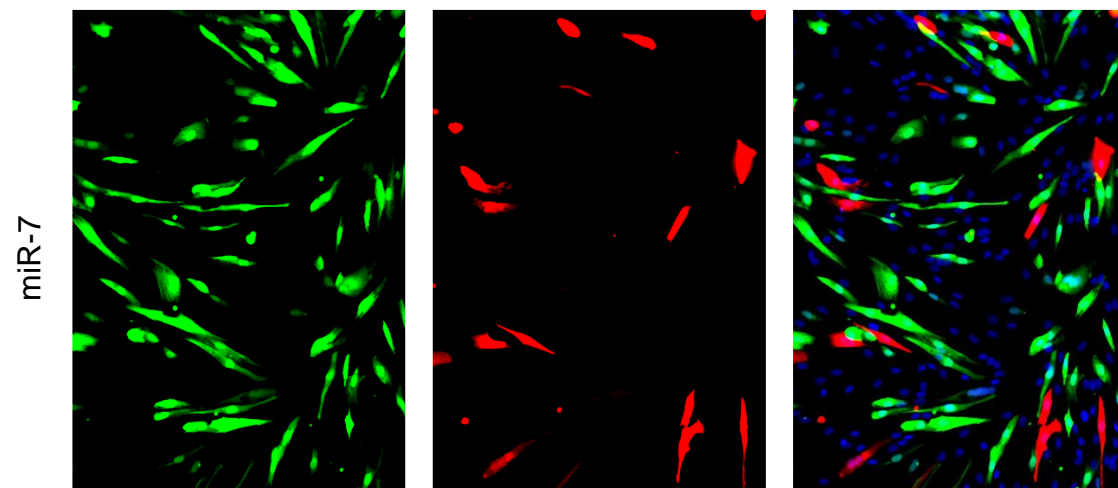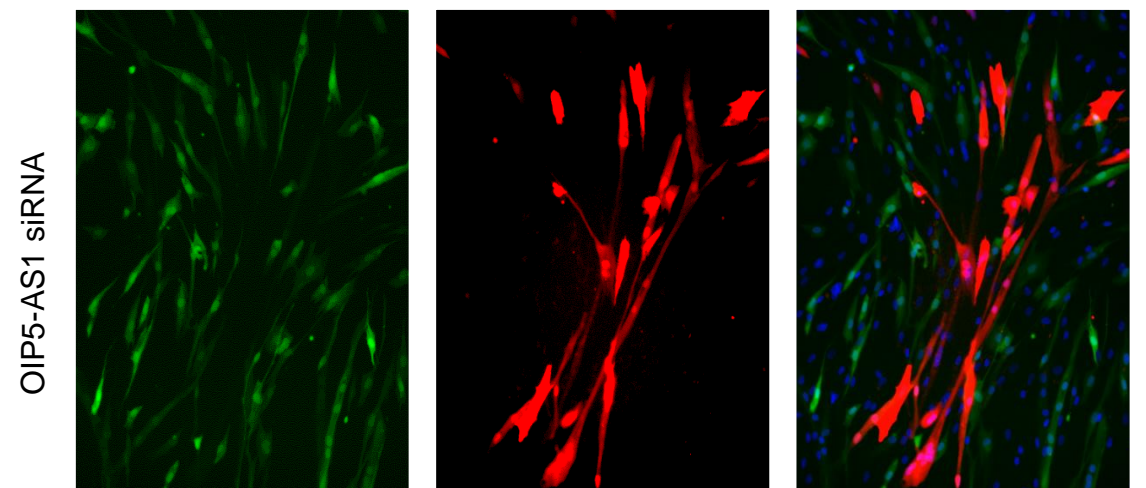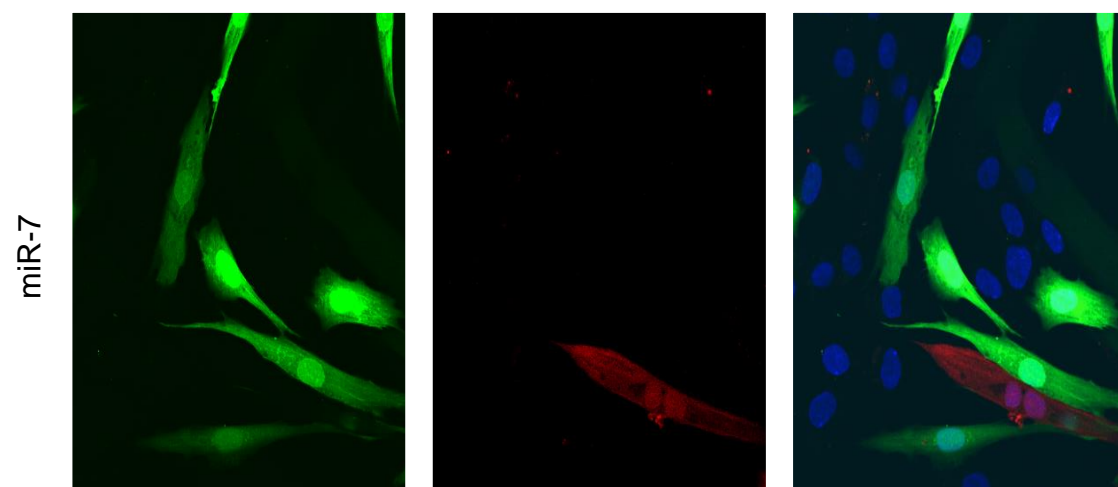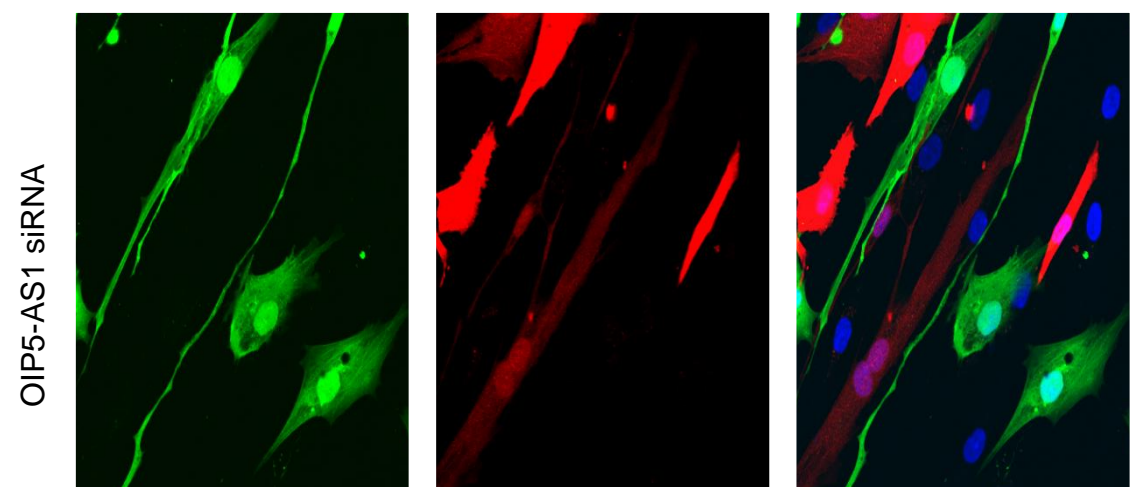

Yang et al. Supplementary Figure S5

**A**

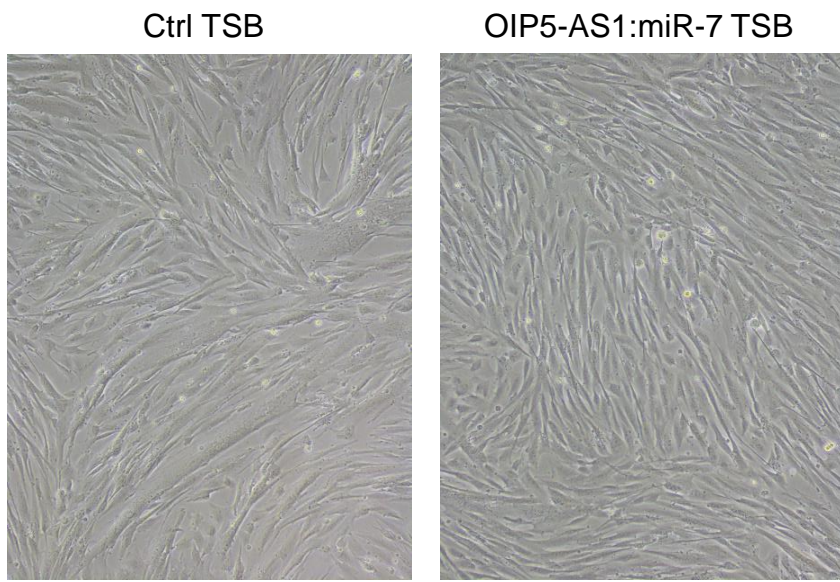

**B**

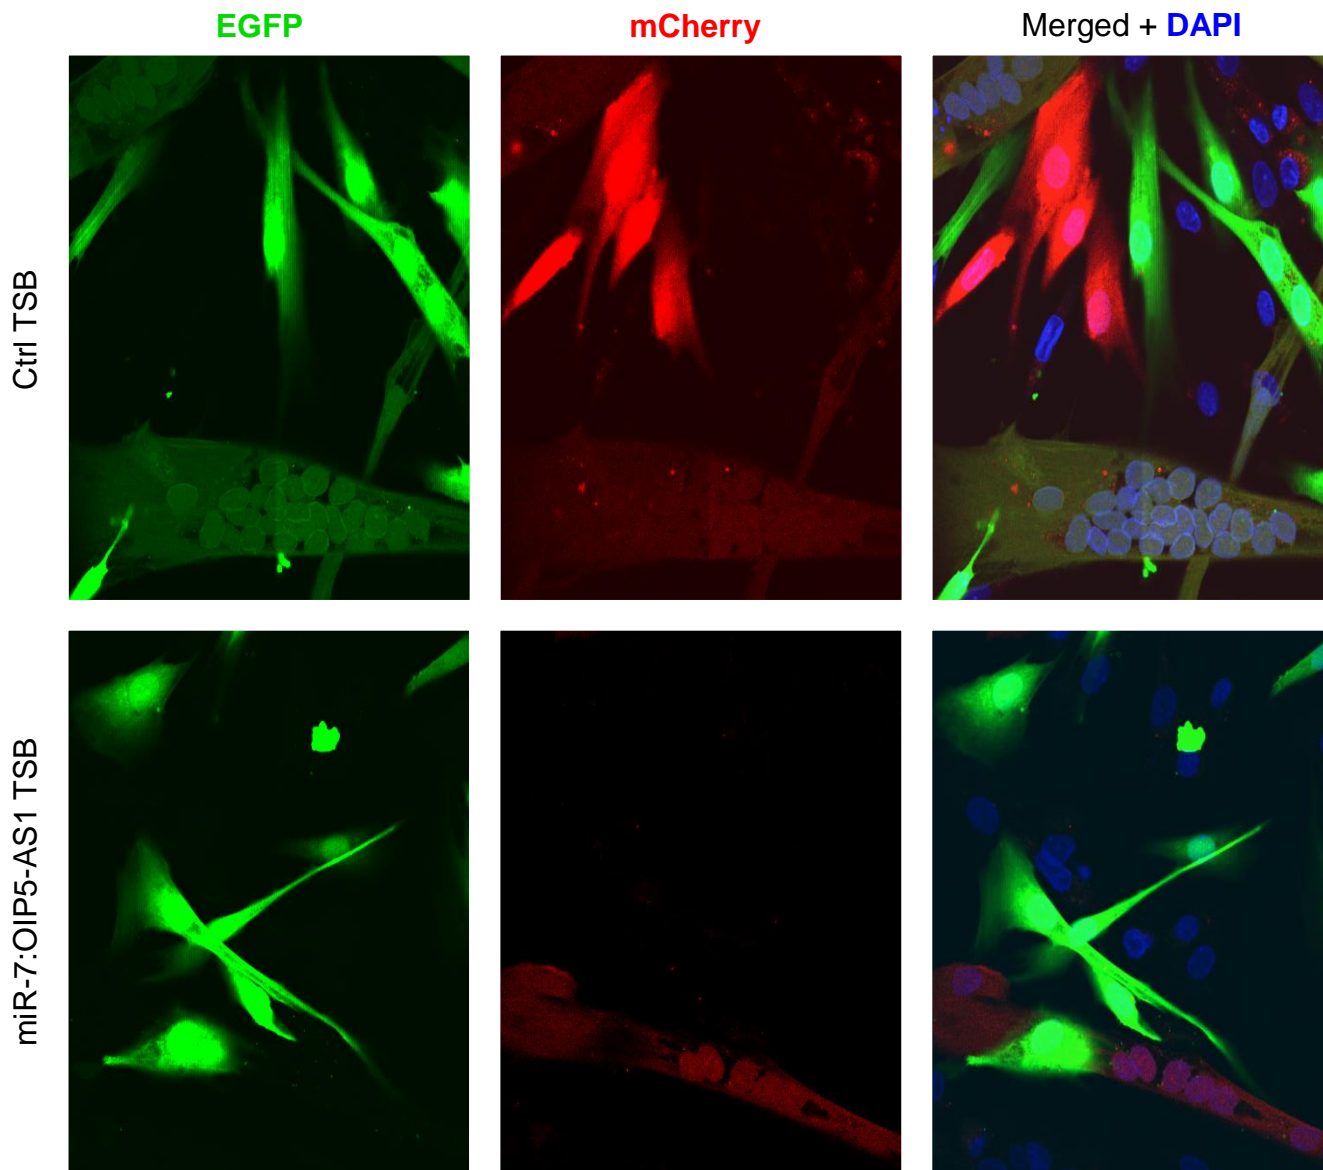

Yang et al. Supplementary Figure S6

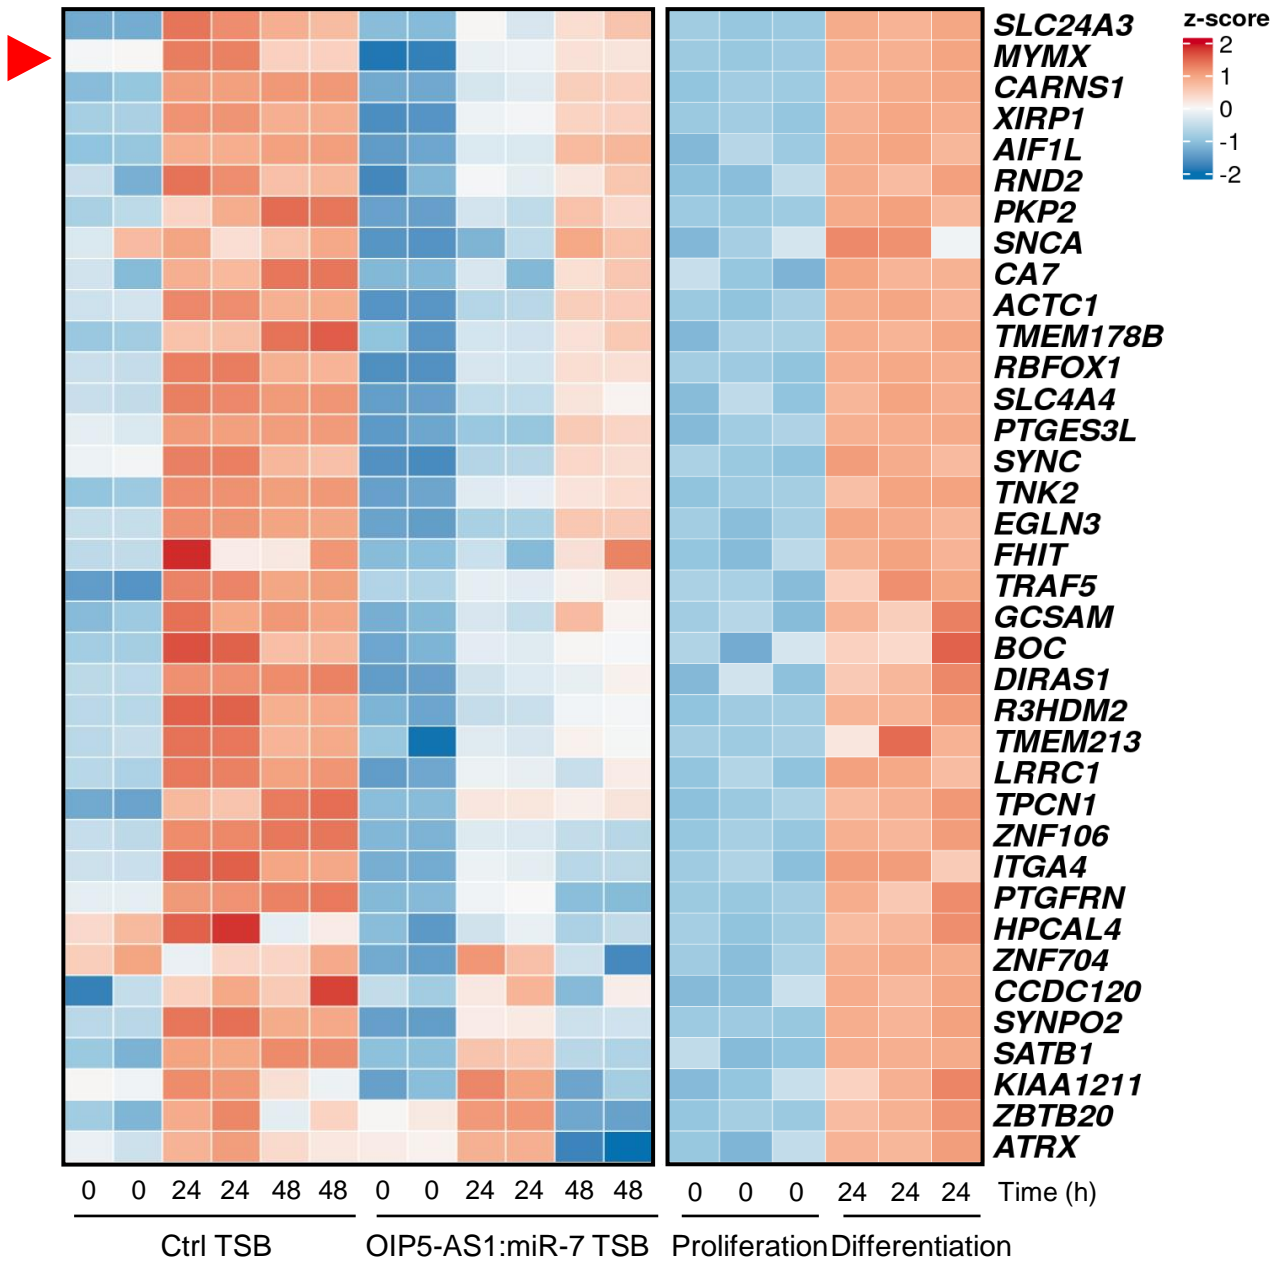

Yang et al. Supplementary Figure S7

**A**

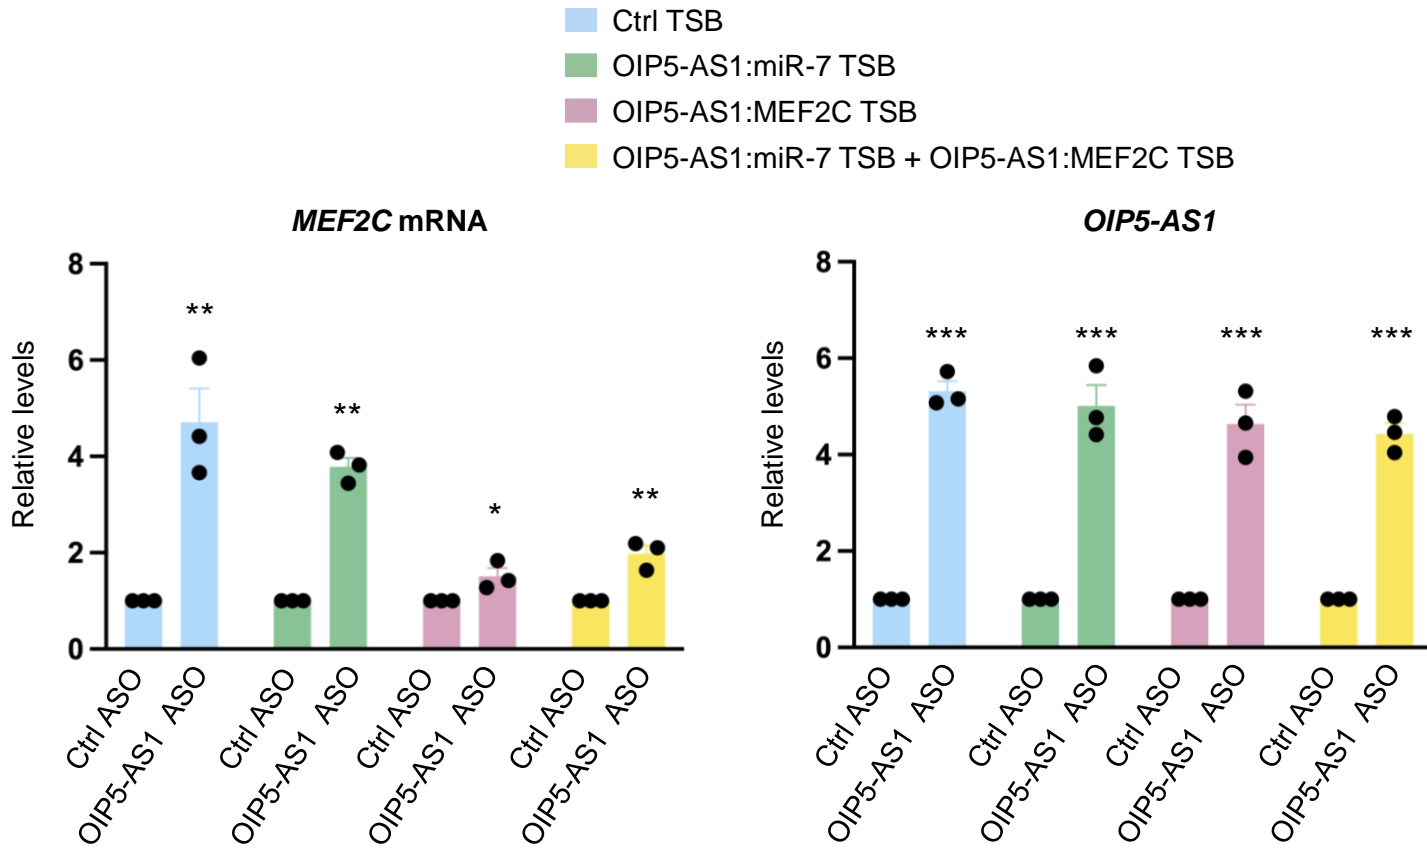

**B**

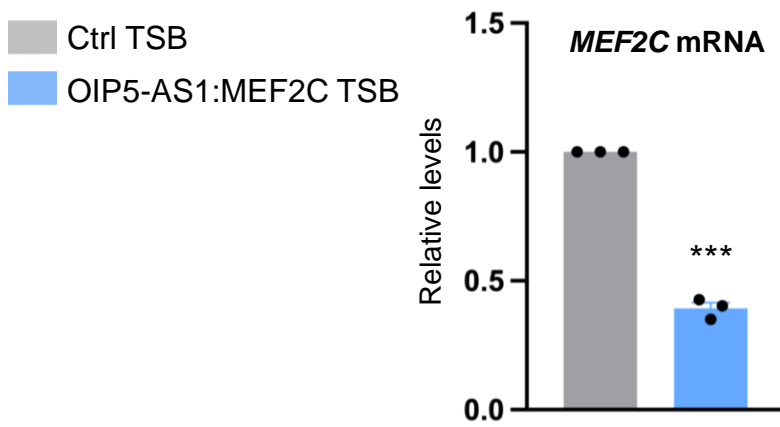

**C**

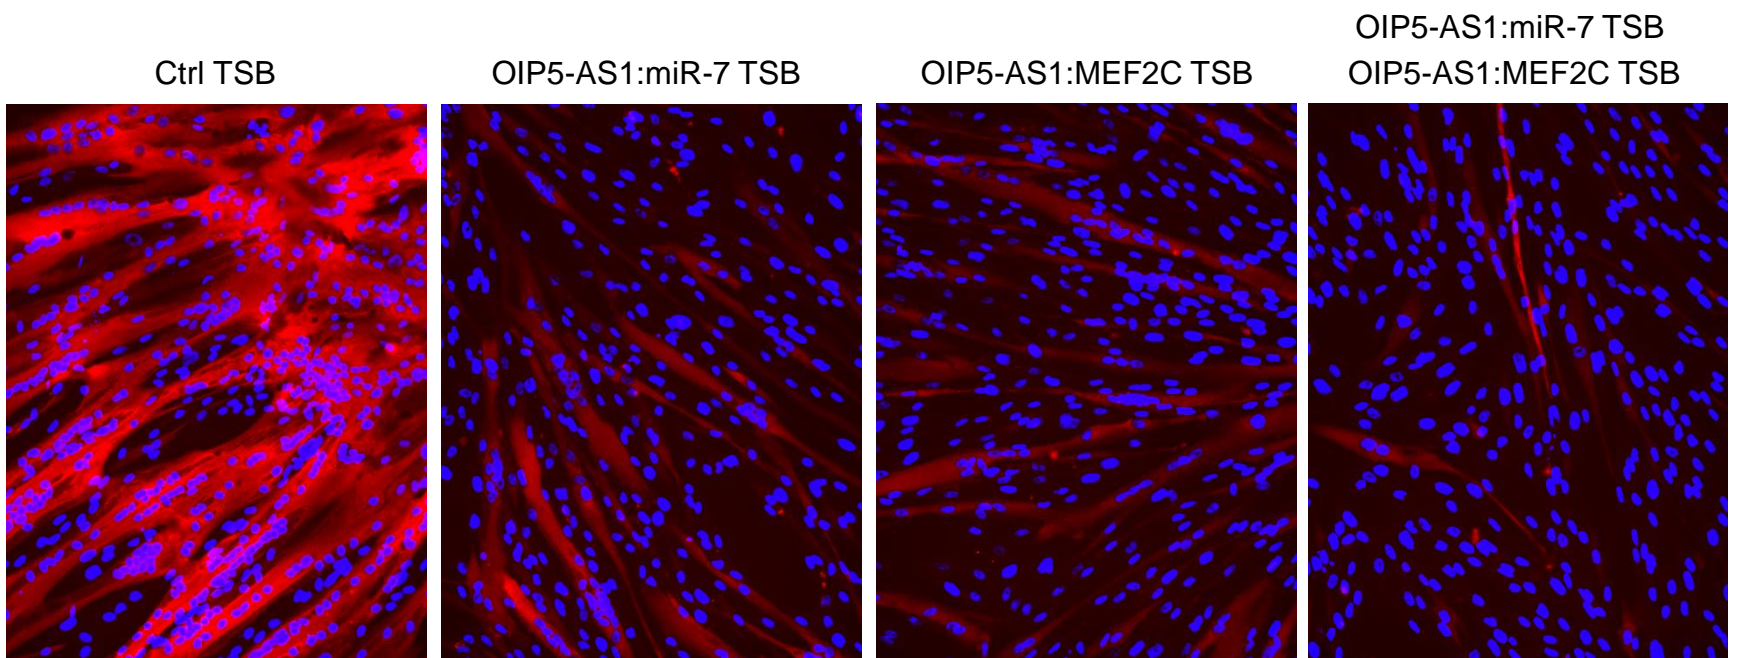

Supplement: gkac524_supplemental_file.pdf [file gkac524_supplemental_file.pdf]
